# Supplementary material
Source: PubMed Central journal article supplement (PMC4613032)
Supplement: ijcem0008-13911-f1.pdf [file ijcem0008-13911-f1.pdf]

## Association between PDZK1 gene polymorphisms and gout

**Table S1.** Demographic and clinical characteristics (Mean  $\pm$  SD) in gout group with kidney stones (S) ( $n = 241$ ) and gout group without kidney stones (G) ( $n = 159$ )

| Parameter                            | G ( $n = 241$ )     | S ( $n = 159$ )    | P     |
|--------------------------------------|---------------------|--------------------|-------|
| Age (year)                           | 51.15 $\pm$ 13.68   | 54.21 $\pm$ 12.56  | 0.022 |
| Body mass index (kg/m <sup>2</sup> ) | 25.92 $\pm$ 3.06    | 26.23 $\pm$ 2.88   | 0.299 |
| Waist to Hip ratio                   | 0.92 $\pm$ 0.06     | 0.92 $\pm$ 0.05    | 0.516 |
| Systolic pressure (mmHg)             | 134.03 $\pm$ 16.92  | 134.67 $\pm$ 16.16 | 0.702 |
| Diastolic pressure (mmHg)            | 84.52 $\pm$ 10.50   | 85.92 $\pm$ 10.37  | 0.189 |
| Blood glucose (mmol/l)               | 5.47 $\pm$ 1.50     | 5.40 $\pm$ 1.32    | 0.650 |
| Uric acid ( $\mu$ mol/l)             | 471.47 $\pm$ 113.70 | 486.69 $\pm$ 99.21 | 0.158 |
| Total cholesterol (mmol/l)           | 5.03 $\pm$ 1.05     | 5.11 $\pm$ 1.02    | 0.443 |
| Triglycerides (mmol/l)               | 2.46 $\pm$ 2.13     | 2.29 $\pm$ 1.70    | 0.376 |
| Creatinine ( $\mu$ mol/l)            | 91.77 $\pm$ 31.31   | 94.42 $\pm$ 27.41  | 0.372 |
| Urea nitrogen (mmol/l)               | 5.52 $\pm$ 1.99     | 5.81 $\pm$ 2.05    | 0.156 |

Data are represented as the mean-standard deviation.

**Table S2.** Genotype distribution and relative allele frequencies of rs12129861 and rs1967017 polymorphism of PDZK1 gene in Chinese in gout group with kidney stones (S) ( $n = 241$ ) and gout group without kidney stones (G) ( $n = 159$ )

| SNP        | Distribution, n (%) |            |            | OR 95% CI  | P value     |       |
|------------|---------------------|------------|------------|------------|-------------|-------|
| rs12129861 | Genotype            | A/A        | A/G        | G/G        |             |       |
|            | S                   | 4 (2.5)    | 33 (20.8)  | 122 (76.7) |             | 0.348 |
|            | G                   | 8 (3.3)    | 64 (26.6)  | 169 (70.1) |             |       |
|            | Allele              | A          | G          | A vs G     |             |       |
|            | S                   | 41 (12.9)  | 277 (87.1) | 0.744      | 0.495~1.117 | 0.152 |
| G          | 80 (16.6)           | 402 (83.4) |            |            |             |       |
| rs1967017  | Genotype            | C/C        | C/T        | T/T        |             |       |
|            | S                   | 2 (1.3)    | 26 (16.4)  | 131 (82.4) |             | 0.341 |
|            | G                   | 5 (2.1)    | 52 (21.6)  | 184 (76.3) |             |       |
|            | Allele              | C          | T          | C vs T     |             |       |
|            | S                   | 30 (9.4)   | 288 (90.6) | 0.706      | 0.445~1.119 | 0.137 |
| G          | 62 (12.9)           | 420 (87.1) |            |            |             |       |

OR, odds ratio; SNP, single nucleotide polymorphism; CI, confidence interval.

**Table S3.** Association of two-marker rs12129861-rs1967017 haplotypes with gout group with kidney stones (S) and gout group without kidney stones (G)

| Haplotype | Frequency     |               | OR (95% CI)         | P Value |
|-----------|---------------|---------------|---------------------|---------|
|           | S             | G             |                     |         |
| A-C       | 26.87 (8.5)   | 58.87 (12.2)  | 0.666 [0.412~1.076] | 0.095   |
| A-T       | 14.13 (4.4)   | 21.13 (4.4)   | 1.017 [0.511~2.026] | 0.961   |
| G-T       | 273.87 (86.1) | 398.87 (82.8) | 1.340 [0.892~2.012] | 0.158   |
